# Supplementary material for: Feasibility and Efficacy of a Parent-Focused, Text Message–Delivered Intervention to Reduce Sedentary Behavior in 2- to 4-Year-Old Children (Mini Movers): Pilot Randomized Controlled Trial
Source: PubMed Central journal article supplement (PMC5889816; doi:10.2196/mhealth.8573), 2018-02-09
Supplement: mhealth_v6i2e39_app1.pdf [file mhealth_v6i2e39_app1.pdf]

## Appendix 1. Examples of text messages

| Type of text message                  | Example content <sup>a</sup>                                                                                                                                                                                                                                                |
|---------------------------------------|-----------------------------------------------------------------------------------------------------------------------------------------------------------------------------------------------------------------------------------------------------------------------------|
| Behavioural                           | Annie, get Josh to help make some playdough! Here's a great recipe with no cooking required: <link to recipe>. Remember, encourage Josh to stand up while playing with it! Katherine – Mini Movers                                                                          |
| Goal-checking                         | Hi Carolyn, how did you go sticking with your goals to limit Sienna's screen time to 60 mins a day and to do puzzles standing up instead of sitting 2 days this week? Text me back YES if you achieved them or NO if you weren't able to this week. Katherine – Mini Movers |
| Goal-checking – response to YES reply | Great to hear! Remember how good you feel achieving your goals – bottle that feeling & use it as motivation on tough days. Keep it up! Katherine – Mini Movers                                                                                                              |
| Goal-checking – response to NO reply  | It's common to slip up sometimes Julia. The important thing is trying again next week! Use your Mini Movers Goal Checker magnet to keep you on track. Katherine – Mini Movers                                                                                               |

<sup>a</sup> Names have been changed for anonymity
