# Supplementary material for: Feasibility and Efficacy of a Parent-Focused, Text Message–Delivered Intervention to Reduce Sedentary Behavior in 2- to 4-Year-Old Children (Mini Movers): Pilot Randomized Controlled Trial
Source: PubMed Central journal article supplement (PMC5889816; doi:10.2196/mhealth.8573), 2018-02-09
Supplement: mhealth_v6i2e39_app2.pdf [file mhealth_v6i2e39_app2.pdf]

Appendix 2. Parent self-reported usage of and engagement with text messages and perceived usefulness and relevance of the intervention

Table 1. Self-reported usage of and engagement with behavioural text messages (n=20)

| Considering the behavioural text messages...          | 11-12 texts<br>n (%) | 9-10 texts<br>n (%) | 7-8 texts<br>n (%) | 5-6 texts<br>n (%) | 3-4 texts<br>n (%) | 1-2 texts<br>n (%) | None<br>n (%) |
|-------------------------------------------------------|----------------------|---------------------|--------------------|--------------------|--------------------|--------------------|---------------|
| How many did you read                                 | 17 (85.0)            | 2 (10.0)            | 0 (0.0)            | 0 (0.0)            | 1 (5.0)            | 0 (0.0)            | 0 (0.0)       |
| How many gave you ideas that you used with your child | 0 (0.0)              | 2 (10.0)            | 5 (25.0)           | 4 (20.0)           | 4 (20.0)           | 4 (20.0)           | 1 (5.0)       |

Table 2. Self-reported usage of and engagement with text messages containing links to videos (n=20)

| Considering the text messages with links to videos...        | 2 texts<br>n (%) | 1 text<br>n (%) | None<br>n (%) |
|--------------------------------------------------------------|------------------|-----------------|---------------|
| How many did you watch in full                               | 6 (30.0)         | 9 (45.0)        | 5 (25.0)      |
| How many did you watch in part                               | 2 (10.0)         | 5 (25.0)        | 13 (65.0)     |
| How many did you watch more than once                        | 2 (10.0)         | 3 (15.0)        | 15 (75.0)     |
| How many gave you ideas that you used with your child (n=19) | 4 (21.5)         | 5 (26.3)        | 10 (52.6)     |

Table 3. Self-reported usage of and engagement with text messages containing links to images and other websites (n=20)

| Considering the text messages with links to images or other websites... | 5 texts<br>n (%) | 4 texts<br>n (%) | 3 texts<br>n (%) | 2 texts<br>n (%) | 1 texts<br>n (%) | None<br>n (%) |
|-------------------------------------------------------------------------|------------------|------------------|------------------|------------------|------------------|---------------|
| How many did you click through to the links                             | 5 (25.0)         | 4 (20.0)         | 2 (10.0)         | 7 (35.0)         | 1 (5.0)          | 1 (5.0)       |
| How many did you click through to more than once                        | 0 (0.0)          | 0 (0.0)          | 1 (5.0)          | 3 (15.0)         | 3 (15.0)         | 13 (65.0)     |
| How many gave you ideas that you used with your child                   | 1 (5.0)          | 0 (0.0)          | 7 (35.0)         | 5 (25.0)         | 4 (20.0)         | 3 (15.0)      |

Table 4. Perceived usefulness of components of the Mini Movers intervention (n=20)

| How <b>useful</b> was/were...      | Extremely<br>n (%) | Very<br>n (%) | Moderately<br>n (%) | Slightly<br>n (%) | Not at all<br>n (%) |
|------------------------------------|--------------------|---------------|---------------------|-------------------|---------------------|
| The information overall            | 2 (10.0)           | 8 (40.0)      | 8 (40.0)            | 2 (10.0)          | 0 (0.0)             |
| The goal planning                  | 3 (15.0)           | 9 (45.0)      | 5 (25.0)            | 3 (15.0)          | 0 (0.0)             |
| The booklet                        | 1 (5.0)            | 9 (45.0)      | 6 (30.0)            | 4 (20.0)          | 0 (0.0)             |
| The text messages                  | 4 (20.0)           | 9 (45.0)      | 2 (10.0)            | 4 (20.0)          | 1 (5.0)             |
| The links to videos (n=19)         | 3 (15.8)           | 6 (31.6)      | 4 (21.1)            | 4 (21.1)          | 2 (10.5)            |
| The links to other websites (n=19) | 2 (10.5)           | 7 (36.8)      | 6 (31.6)            | 2 (10.5)          | 2 (10.5)            |

Table 5. Perceived relevance of components of the Mini Movers intervention (n=20)

| How <b>relevant</b> was/were...    | Extremely<br>n (%) | Very<br>n (%) | Moderately<br>n (%) | Slightly<br>n (%) | Not at all<br>n (%) |
|------------------------------------|--------------------|---------------|---------------------|-------------------|---------------------|
| The information overall            | 2 (10.0)           | 8 (40.0)      | 7 (35.0)            | 2 (10.0)          | 1 (5.0)             |
| The goal planning                  | 4 (20.0)           | 9 (45.0)      | 4 (20.0)            | 2 (10.0)          | 1 (5.0)             |
| The booklet                        | 0 (0.0)            | 11 (55.0)     | 2 (10.0)            | 7 (35.0)          | 0 (0.0)             |
| The text messages                  | 2 (10.0)           | 8 (40.0)      | 3 (15.0)            | 6 (30.0)          | 1 (5.0)             |
| The links to videos (n=19)         | 1 (5.3)            | 8 (42.1)      | 3 (15.8)            | 5 (26.3)          | 2 (10.5)            |
| The links to other websites (n=19) | 1 (5.3)            | 8 (42.1)      | 5 (26.3)            | 3 (15.8)          | 2 (10.5)            |
